# Supplementary material for: Effect of Selenium Sources on Laying Performance, Egg Quality Characteristics, Intestinal Morphology, Microbial Population and Digesta Volatile Fatty Acids in Laying Hens
Source: MDPI journal article supplement (doi:10.3390/ani11061681), 2021-06-04
Supplement: s1 [file s1]

## Supplementary Materials

**Table 1.** Ingredient Compositions and Calculated Nutrient Levels of the Basal Diet (on Dry Matter Basis).

| Ingredients                    | Pre-Lay    |
|--------------------------------|------------|
| Corn (QL)                      | 49.50      |
| Soybean Meal (QL)              | 23.00      |
| Wheat Pollard (QL)             | 18.50      |
| CPO (QL)                       | 1.50       |
| L-Lysine                       | 0.10       |
| DL-Methionine                  | 0.17       |
| Dicalcium Phosphate (18%)      | 2.00       |
| Calcium Carbonate              | 1.60       |
| Choline Chloride               | 0.15       |
| Salt                           | 0.35       |
| Mineral Mix *                  | 1.00       |
| Vitamin Mix **                 | 1.00       |
| Antioxidant ***                | 0.62       |
| Toxin Binder ****              | 0.62       |
| <b>Total</b>                   | <b>100</b> |
| <b>Calculated Composition</b>  |            |
| Metabolizable Energy Kcal/Kg   | 2760.14    |
| Protein (%)                    | 16.35      |
| Fat (%)                        | 3.48       |
| Fiber (%)                      | 4.27       |
| Calcium (%)                    | 1.32       |
| Total Phosphorus (%)           | 0.10       |
| Av. Phosphorus for Poultry (%) | 0.56       |

\* Mineral premix supplied (per kg of diet): copper 15 mg, zinc 120 mg, iron 120 mg, manganese 150 mg, iodine 1.5 mg, and cobalt 0.4 mg. \*\* Vitamin premix supplied (per kg of diet): Vitamin A (retinyl acetate) 10.32 mg, vitamin E (DL-tocopherol acetate) 90 mg, cholecalciferol 0.250 mg, vitamin K 6 mg, cobalamin 0.07 mg, thiamine 7 mg, riboflavin 22 mg, niacin 120 mg, folic acid 3 mg, biotin 0.04 mg, pantothenic acid 35 mg and pyridoxine 12 mg. \*\*\* Antioxidant contains butylated hydroxyanisole (BHA). \*\*\*\* Toxin binder contains natural hydrated sodium calcium aluminum silicates to reduce the exposure of feed to mycotoxins. Feed live International Software (Nonthaburi, Thailand) was used to formulate the diets.
